# Supplementary material
Source: publisher site journal article supplement (https://www.dovepress.com/article/283853)
Supplement: Supplementary file 1 [file get_supplementary_file.php]

Supplementary Tables 1. Cox proportional hazards ratios (HRs) for hand grip, back muscle strength, and normalized strength for incident diabetes

|  |  |  | HR (95% CI) P* | | | P for trend |
| --- | --- | --- | --- | --- | --- | --- |
|  | Variables | Quartile 1 | Quartile 2 | Quartile 3 | Quartile 4 |
| Hand grip strength (HGS) | |  |  |  |  |  |
| Women | BMI-normalized HGS | Reference | 0.804 (0.622-1.041) 0.098 | 0.804 (0.615-1.050) 0.109 | 0.688 (0.507-0.934) 0.016 | 0.237 |
|  | Weight-normalized HGS | Reference | 0.767 (0.590-0.998) 0.048 | 0.868 (0.669-1.127) 0.288 | 0.691 (0.511-0.934) 0.016 | 0.185 |
|  | Weight2/3-normalized HGS | Reference | 0.821 (0.636-1.061) 0.132 | 0.815 (0.628-1.056) 0.122 | 0.608 (0.447-0.827) 0.002 | 0.479 |
|  | WC-normalized HGS | Reference | 0.901 (0.699-1.162) 0.422 | 0.871 (0.661-1.149) 0.329 | 0.720 (0.526-0.987) 0.041 | 0.770 |
|  | WHR-normalized HGS | Reference | 0.952 (0.739-1.228) 0.707 | 0.853 (0.646-1.125) 0.259 | 0.763 (0.561-1.038) 0.085 | 0.931 |
| Men | BMI-normalized HGS | Reference | 0.889 (0.710-1.113) 0.304 | 0.803 (0.635-1.016) 0.067 | 0.744 (0.573-0.967) 0.027 | 0.451 |
|  | Weight-normalized HGS | Reference | 0.947 (0.758-1.183) 0.632 | 0.815 (0.641-1.036) 0.094 | 0.773 (0.599-0.999) 0.049 | 0.762 |
|  | Weight2/3-normalized HGS | Reference | 0.815 (0.653-1.016) 0.069 | 0.647 (0.507-0.827) 0.001 | 0.768 (0.596-0.990) 0.041 | 0.031 |
|  | WC-normalized HGS | Reference | 0.939 (0.750-1.176) 0.586 | 0.806 (0.635-1.022) 0.075 | 0.763 (0.587-0.991) 0.043 | 0.718 |
|  | WHR-normalized HGS | Reference | 1.065 (0.852-1.330) 0.582 | 0.785 (0.614-1.005) 0.055 | 0.757 (0.587-0.975) 0.031 | 0.539 |
| Back muscle strength (BMS) | |  |  |  |  |  |
| Women | BMI-normalized BMS | Reference | 0.866 (0.667-1.124) 0.280 | 0.912 (0.698-1.191) 0.500 | 0.662 (0.491-0.893) 0.007 | 0.792 |
|  | Weight-normalized BMS | Reference | 0.930 (0.717-1.205) 0.582 | 0.944 (0.722-1.234) 0.674 | 0.712 (0.531-0.954) 0.023 | 0.881 |
|  | Weight2/3-normalized HGS | Reference | 1.008 (0.786-1.293) 0.948 | 0.790 (0.603-1.034) 0.086 | 0.640 (0.475-0.862) 0.003 | 0.566 |
|  | WC-normalized BMS | Reference | 0.820 (0.631-1.067) 0.139 | 0.981 (0.754-1.277) 0.887 | 0.587 (0.432-0.798) 0.001 | 0.850 |
|  | WHR-normalized BMS | Reference | 0.932 (0.718-1.209) 0.595 | 0.971 (0.742-1.271) 0.831 | 0.658 (0.486-0.891) 0.007 | 0.675 |
| Men | BMI-normalized BMS | Reference | 0.926 (0.739-1.159) 0.502 | 0.786 (0.619-0.997) 0.047 | 0.772 (0.603-0.988) 0.040 | 0.562 |
|  | Weight-normalized BMS | Reference | 1.036 (0.826-1.300) 0.759 | 0.851 (0.670-1.081) 0.186 | 0.861 (0.672-1.104) 0.238 | 0.800 |
|  | Weight2/3-normalized HGS | Reference | 0.926 (0.739-1.161) 0.506 | 0.834 (0.660-1.054) 0.128 | 0.779 (0.604-1.005) 0.055 | 0.660 |
|  | WC-normalized BMS | Reference | 0.926 (0.740-1.158) 0.500 | 0.748 (0.586-0.956) 0.020 | 0.790 (0.619-1.007) 0.057 | 0.438 |
|  | WHR-normalized BMS | Reference | 0.980 (0.782-1.229) 0.861 | 0.691 (0.539-0.886) 0.004 | 0.843 (0.663-1.071) 0.161 | 0.484 |

*Adjusted for age, family history of diabetes, exercise, alcohol consumption ex- and current smoking status, job, HDL-cholesterol, triglycerides, fasting glucose, hypertension, cardiovascular diseases, and energy consumption for men at baseline, and adjusted for menopause for women at baseline in addition to the adjustments made for men.

Supplementary Tables 2. Cox proportional hazards ratios (HRs) of hand grip, back muscle strength, and normalized strength for incident diabetes in premenopausal and postmenopausal women

|  |  |  | HR (95% CI) P* | | | P for trend |
| --- | --- | --- | --- | --- | --- | --- |
|  | Variables | Quartile 1 | Quartile 2 | Quartile 3 | Quartile 4 |
| Hand grip strength (HGS) | |  |  |  |  |  |
| Premenopausal | BMI-normalized HGS | Reference | 0.766 (0.562-1.044) 0.092 | 0.743 (0.541-1.021) 0.067 | 0.681 (0.485-0.955) 0.026 | 0.156 |
|  | Weight-normalized HGS | Reference | 0.745 (0.544-1.020) 0.066 | 0.871 (0.643-1.181) 0.375 | 0.658 (0.466-0.929) 0.018 | 0.232 |
|  | Weight2/3-normalized HGS | Reference | 0.768 (0.567-1.041) 0.089 | 0.799 (0.591-1.081) 0.146 | 0.579 (0.407-0.823) 0.002 | 0.345 |
|  | WC-normalized HGS | Reference | 0.804 (0.591-1.093) 0.164 | 0.872 (0.636-1.196) 0.394 | 0.649 (0.455-0.927) 0.017 | 0.469 |
|  | WHR-normalized HGS | Reference | 0.908 (0.671-1.230) 0.535 | 0.801 (0.582-1.103) 0.174 | 0.691 (0.487-0.980) 0.038 | 0.775 |
| Postmenopausal | BMI-normalized HGS | Reference | 0.821 (0.505-1.335) 0.427 | 0.963 (0.576-1.610) 0.885 | 0.643 (0.278-1.486) 0.301 | 0.827 |
|  | Weight-normalized HGS | Reference | 0.827 (0.494-1.384) 0.470 | 0.783 (0.462-1.329) 0.366 | 0.948 (0.495-1.815) 0.873 | 0.377 |
|  | Weight2/3-normalized HGS | Reference | 0.966 (0.586-1.594) 0.893 | 0.789 (0.460-1.353) 0.389 | 0.747 (0.391-1.427) 0.377 | 0.955 |
|  | WC-normalized HGS | Reference | 1.110 (0.698-1.765) 0.660 | 0.768 (0.423-1.395) 0.386 | 1.193 (0.586-2.431) 0.627 | 0.874 |
|  | WHR-normalized HGS | Reference | 1.051 (0.650-1.700) 0.838 | 0.951 (0.543-1.666) 0.862 | 1.170 (0.591-2.316) 0.652 | 0.944 |
| Back muscle strength (BMS) | |  |  |  |  |  |
| Premenopausal | BMI-normalized BMS | Reference | 0.884 (0.650-1.201) 0.430 | 0.946 (0.695-1.288) 0.726 | 0.662 (0.471-0.931) 0.018 | 0.977 |
|  | Weight-normalized BMS | Reference | 0.959 (0.707-1.301) 0.789 | 0.975 (0.719-1.323) 0.872 | 0.712 (0.508-0.998) 0.049 | 0.701 |
|  | Weight2/3-normalized HGS | Reference | 0.993 (0.742-1.329) 0.964 | 0.865 (0.636-1.176) 0.355 | 0.607 (0.428-0.861) 0.005 | 0.485 |
|  | WC-normalized BMS | Reference | 0.839 (0.615-1.145) 0.269 | 0.998 (0.739-1.349) 0.990 | 0.596 (0.419-0.849) 0.004 | 0.984 |
|  | WHR-normalized BMS | Reference | 0.869 (0.639-1.182) 0.371 | 0.949 (0.697-1.292) 0.739 | 0.640 (0.453-0.906) 0.012 | 0.956 |
| Postmenopausal | BMI-normalized BMS | Reference | 0.789 (0.472-1.319) 0.366 | 0.728 (0.418-1.269) 0.263 | 0.637 (0.338-1.200) 0.163 | 0.500 |
|  | Weight-normalized BMS | Reference | 0.804 (0.481-1.346) 0.407 | 0.745 (0.414-1.343) 0.328 | 0.630 (0.349-1.139) 0.126 | 0.568 |
|  | Weight2/3-normalized HGS | Reference | 0.964 (0.582-1.598) 0.888 | 0.534 (0.295-0.966) 0.038 | 0.702 (0.393-1.257) 0.234 | 0.651 |
|  | WC-normalized BMS | Reference | 0.741 (0.445-1.233) 0.248 | 0.778 (0.440-1.376) 0.388 | 0.529 (0.283-0.989) 0.046 | 0.541 |
|  | WHR-normalized BMS | Reference | 1.083 (0.646-1.817) 0.762 | 0.871 (0.491-1.543) 0.635 | 0.626 (0.333-1.176) 0.145 | 0.503 |

*Adjusted for age, family history of diabetes, exercise, alcohol consumption ex- and current smoking status, job, HDL-cholesterol, triglycerides, fasting glucose, hypertension, cardiovascular diseases, and energy consumption for men at baseline, and adjusted for menopause for women at baseline in addition to the adjustments made for men.

Supplementary Tables 3. Sensitivity analysis of body mass index normalized hand grip strength and back strength for incident diabetes during the follow-up duration

|  |  | Follow-up | | |
| --- | --- | --- | --- | --- |
|  |  | 2nd | 6th | 9th |
|  | Variables | HR (95% CI) P* | HR (95% CI) P* | HR (95% CI) P* |
| Hand grip strength (HGS) | |  |  |  |
| Women | BMI-normalized HGS | 0.851 (0.712-1.018) 0.077 | 0.913 (0.803-1.038) 0.163 | 0.859 (0.772-0.956) 0.005 |
|  | Weight-normalized HGS | 0.872 (0.734-1.036) 0.119 | 0.957 (0.844-1.084) 0.486 | 0.885 (0.797-0.983) 0.023 |
|  | Weight2/3-normalized HGS | 0.878 (0.736-1.047) 0.149 | 0.919 (0.808-1.045) 0.196 | 0.847 (0.759-0.947) 0.003 |
|  | WC-normalized HGS | 0.831 (0.692-0.999) 0.049 | 0.897 (0.786-1.024) 0.109 | 0.842 (0.754-0.939) 0.002 |
|  | WHR-normalized HGS | 0.835 (0.696-1.002) 0.053 | 0.909 (0.798-1.036) 0.153 | 0.858 (0.771-0.956) 0.005 |
| Men | BMI-normalized HGS | 0.848 (0.726-0.989) 0.036 | 0.863 (0.771-0.965) 0.010 | 0.889 (0.809-0.978) 0.015 |
|  | Weight-normalized HGS | 0.897 (0.773-1.040) 0.150 | 0.906 (0.813-1.010) 0.075 | 0.913 (0.833-1.002) 0.054 |
|  | Weight2/3-normalized HGS | 0.949 (0.812-1.109) 0.510 | 0.957 (0.853-1.074) 0.457 | 0.923 (0.836-1.020) 0.116 |
|  | WC-normalized HGS | 0.846 (0.722-0.992) 0.039 | 0.841 (0.751-0.941) 0.003 | 0.877 (0.798-0.964) 0.006 |
|  | WHR-normalized HGS | 0.842 (0.719-0.986) 0.033 | 0.826 (0.739-0.925) 0.001 | 0.877 (0.799-0.962) 0.005 |
| Back muscle strength (BMS) | |  |  |  |
| Women | BMI-normalized BMS | 0.859 (0.722-1.022) 0.086 | 0.927 (0.818-1.051) 0.237 | 0.880 (0.792-0.977) 0.017 |
|  | Weight-normalized BMS | 0.883 (0.746-1.045) 0.147 | 0.965 (0.854-1.090) 0.567 | 0.906 (0.817-1.005) 0.061 |
|  | Weight2/3-normalized HGS | 0.886 (0.748-1.051) 0.164 | 0.940 (0.829-1.066) 0.332 | 0.873 (0.784-0.972) 0.014 |
|  | WC-normalized BMS | 0.856 (0.717-1.023) 0.088 | 0.920 (0.810-1.044) 0.197 | 0.872 (0.784-0.970) 0.012 |
|  | WHR-normalized BMS | 0.856 (0.716-1.024) 0.089 | 0.923 (0.813-1.048) 0.215 | 0.880 (0.792-0.978) 0.018 |
| Men | BMI-normalized BMS | 0.927 (0.802-1.072) 0.305 | 0.870 (0.784-0.966) 0.009 | 0.903 (0.826-0.987) 0.024 |
|  | Weight-normalized BMS | 0.965 (0.837-1.113) 0.628 | 0.904 (0.816-1.002) 0.054 | 0.924 (0.846-1.008) 0.076 |
|  | Weight2/3-normalized HGS | 0.984 (0.848-1.142) 0.833 | 0.930 (0.834-1.037) 0.193 | 0.917 (0.835-1.007) 0.069 |
|  | WC-normalized BMS | 0.936 (0.808-1.085) 0.381 | 0.862 (0.776-0.958) 0.006 | 0.899 (0.823-0.983) 0.020 |
|  | WHR-normalized BMS | 0.938 (0.810-1.086) 0.390 | 0.858 (0.772-0.953) 0.004 | 0.903 (0.827-0.987) 0.025 |

*Adjusted for age, family history of diabetes, exercise, alcohol consumption ex- and current smoking status, job, HDL-cholesterol, triglycerides, fasting glucose, hypertension, energy consumption for men at baseline, and adjusted for menopause for women at baseline in addition to the adjustments made for men.
